# Supplementary figures and images for: A small molecule directly inhibits the p53 transactivation domain from binding to replication protein A
Source: PubMed Central journal article supplement — Nucleic Acids Res. 2012 Dec 24;41(3):2047–59. doi: 10.1093/nar/gks1291 (PMC3561959; doi:10.1093/nar/gks1291), 2012-12-24

Figure S1

S1 A

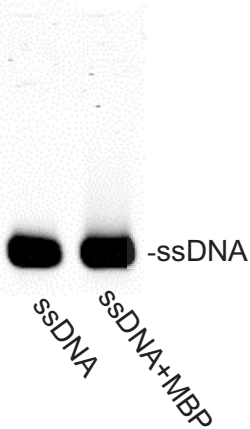

S1 B

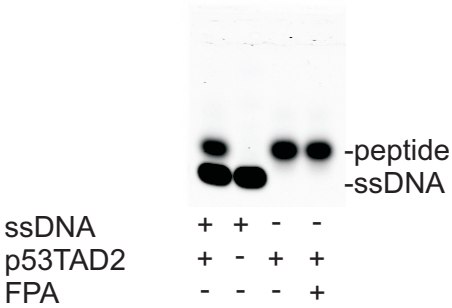

Figure S2

S2 A

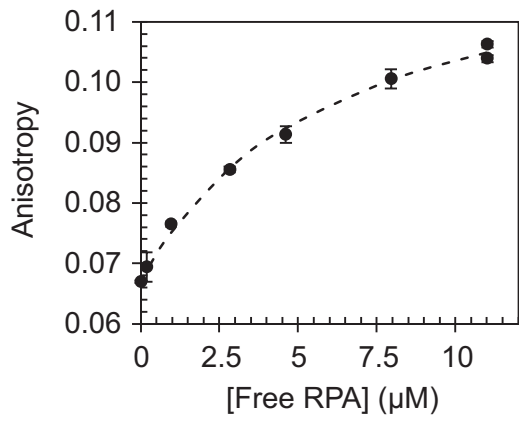

S2 B

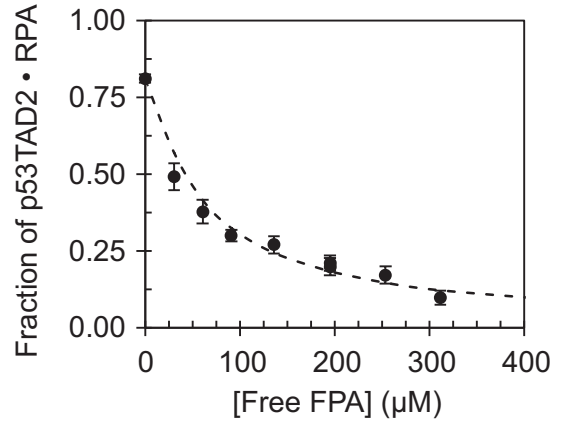

S2 C

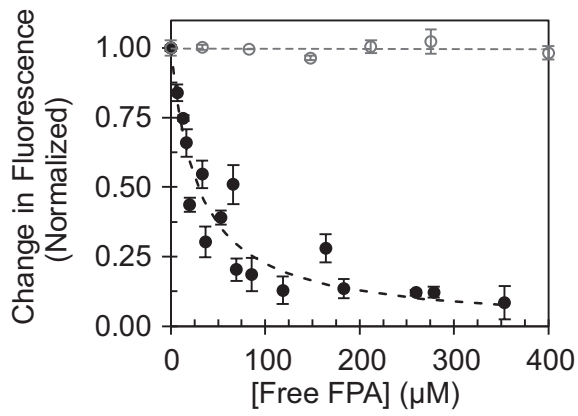

S2 D

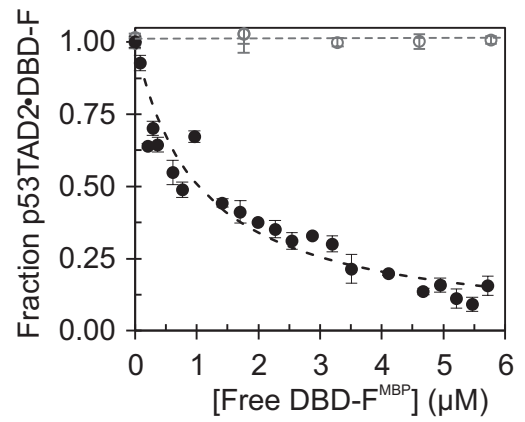

S2 E

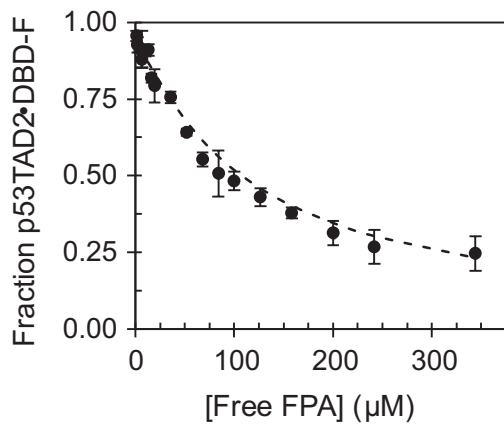

S2 F

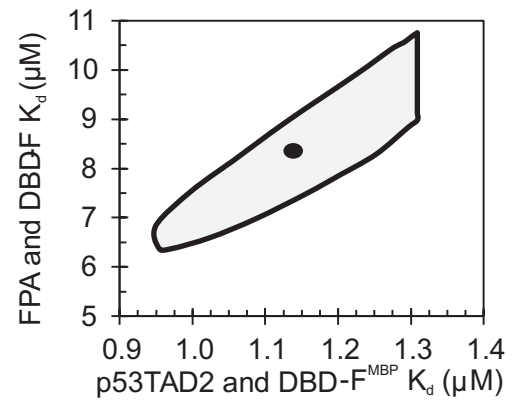

Figure S3

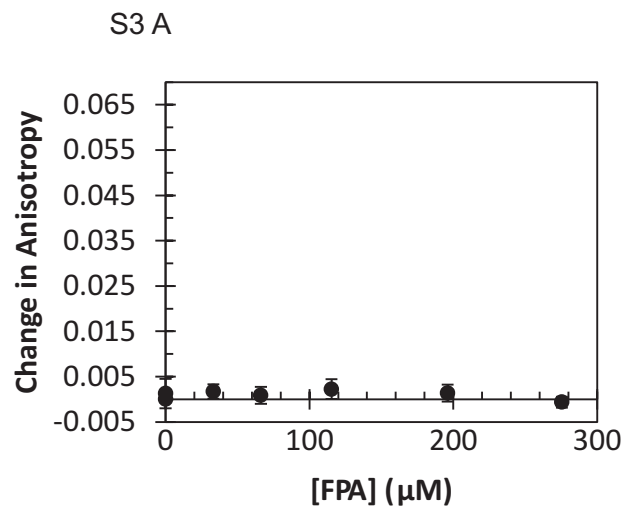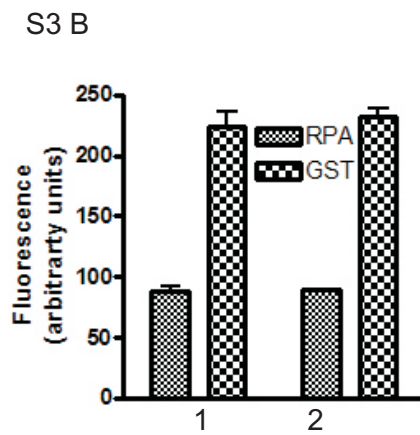

Figure S4

S4 A

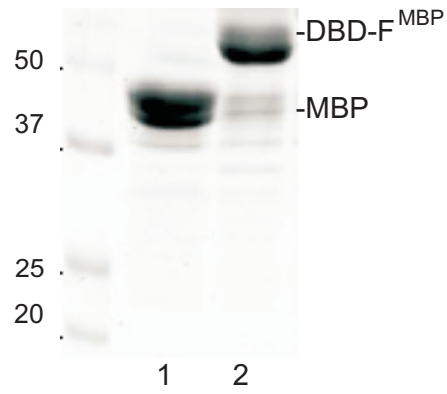

S4 B

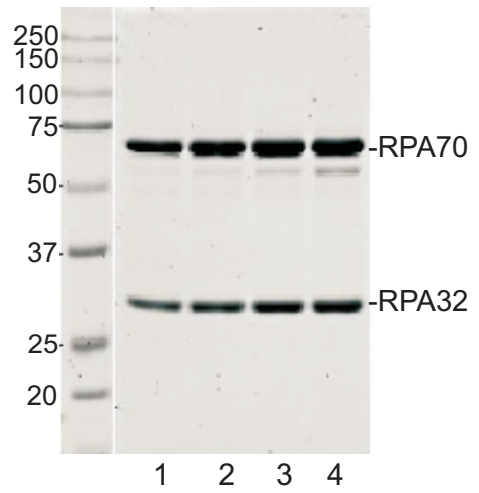

S4 C

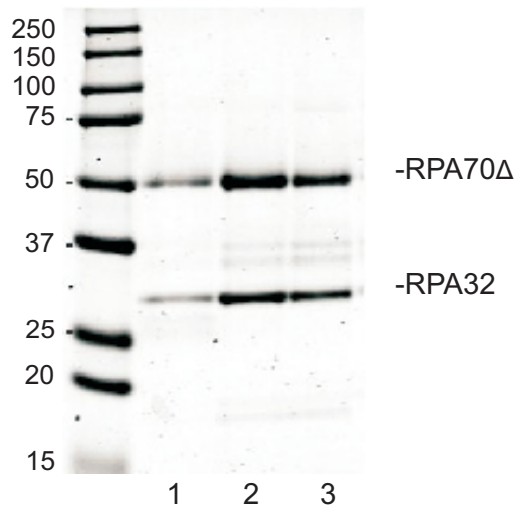

S4 D

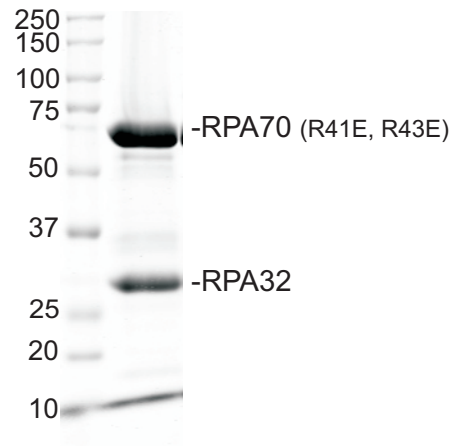

S4 E

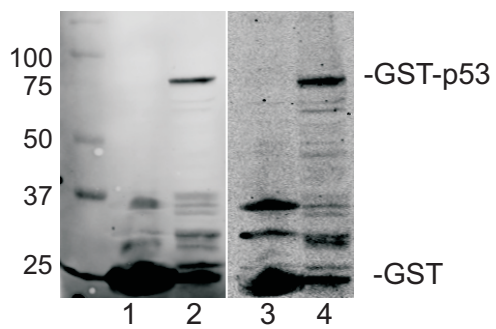

Supplement: supp_gks1291_nar-01910-m-2012-File004.pdf [file supp_gks1291_nar-01910-m-2012-File004.pdf]
